# Supplementary material
Source: MDPI journal article supplement (https://www.mdpi.com/2073-4352/13/7/1110)
Supplement: s1 [file s1 › crystals-2487902-supplementary.pdf]

# Supporting information

## Colloidal Synthesis and Ultraviolet Luminescence of $\text{Rb}_2\text{AgI}_3$ Nanocrystals

Yuan Deng <sup>1,†</sup>, Yicheng Zeng <sup>1,†</sup>, Wanying Gu <sup>1</sup>, Pan Huang <sup>1</sup>, Geyu Jin <sup>1</sup>, Fangze Liu <sup>2</sup>,  
Jing Wei <sup>1</sup> and Hongbo Li <sup>1,\*</sup>

<sup>1</sup> School of Materials Science and Engineering, Beijing Institute of Technology, Beijing 100081, China

<sup>2</sup> Advanced Research Institute of Multidisciplinary Sciences, Beijing Institute of Technology, Beijing 100081, China

\* Correspondence: hongbo.li@bit.edu.cn

† These authors have contributed equally to this work.

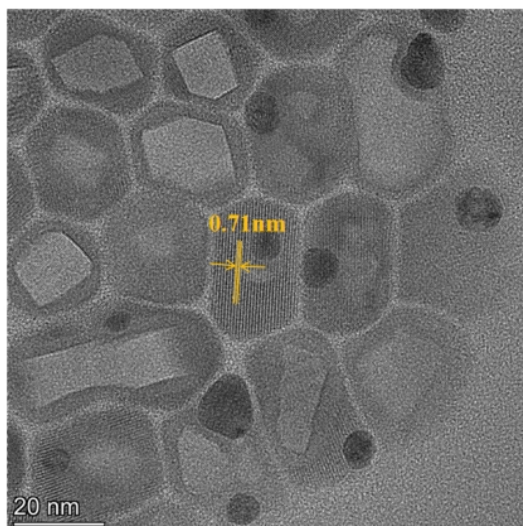

**Figure S1.** HRTEM image of Rb<sub>2</sub>AgI<sub>3</sub> NCs.

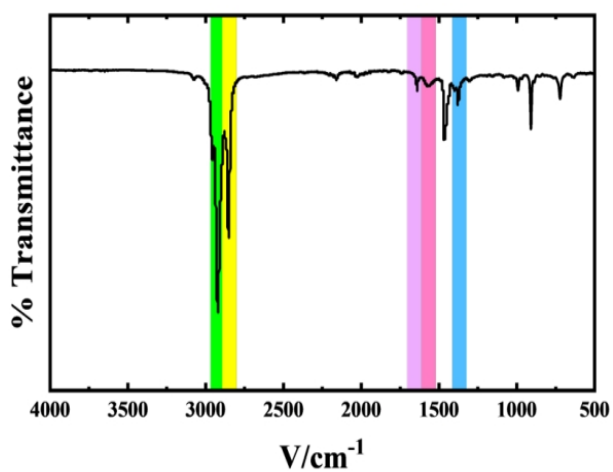

**Figure S2.** FTIR pattern of Rb<sub>2</sub>AgI<sub>3</sub> NCs. Vibrating bands at 1650 cm<sup>-1</sup> and 1380 cm<sup>-1</sup> can be assigned to countersymmetric telescopic vibration and symmetrical telescopic vibration modes from oleic acid ligand -COO<sup>-</sup>, respectively. Peaks around 1570 cm<sup>-1</sup> indicate the bending vibration of the -NH<sub>2</sub> group N-H in oleamine. The vibration bands at 2930 cm<sup>-1</sup> and 2860 cm<sup>-1</sup> are attributed to the C-H bond tensile vibrations of -CH<sub>3</sub> and -CH<sub>2</sub>, respectively.

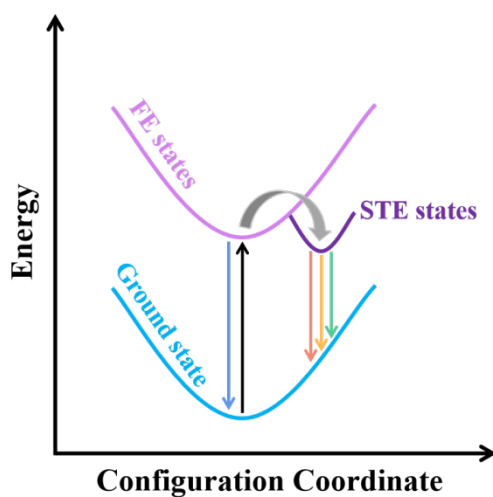

**Figure S3.** Schematic diagram of self-trapped exciton luminescence mechanism.

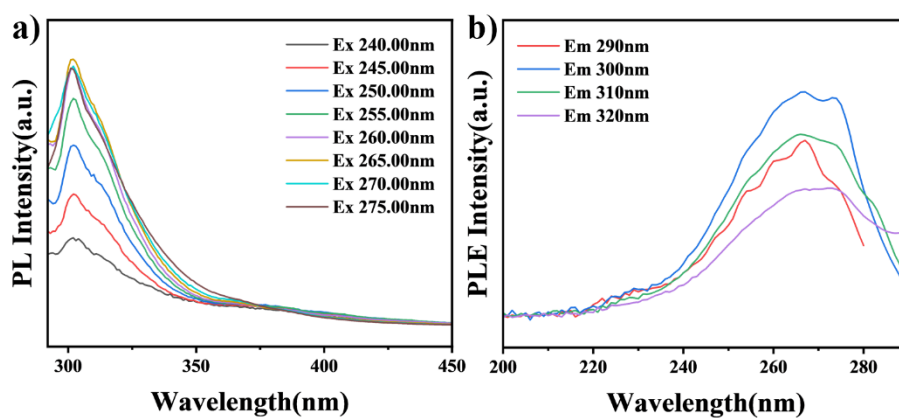

**Figure S4.** Wavelength-dependent (a) PL and (b) PLE spectra of  $\text{Rb}_2\text{AgI}_3$  NCs.

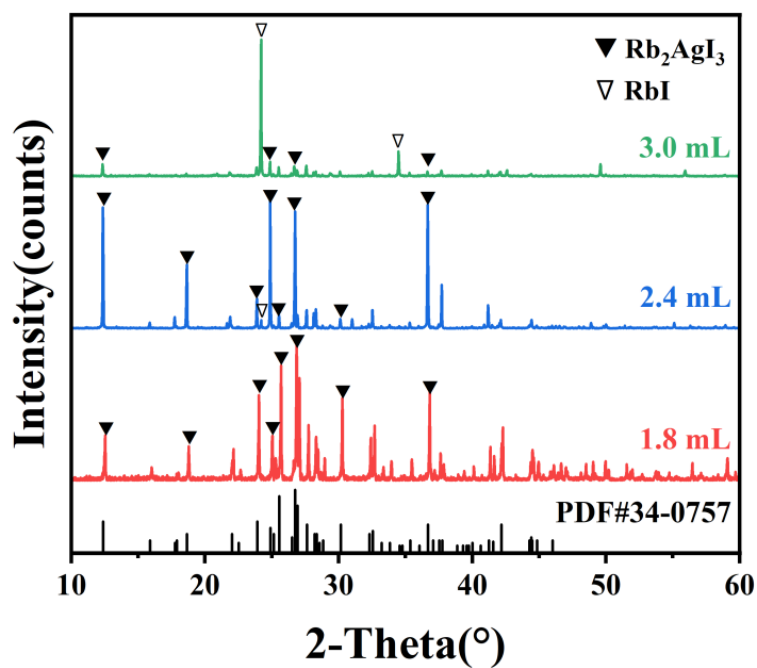

**Figure S5.** XRD pattern of the product obtained by changing the amount of iodine precursor injection

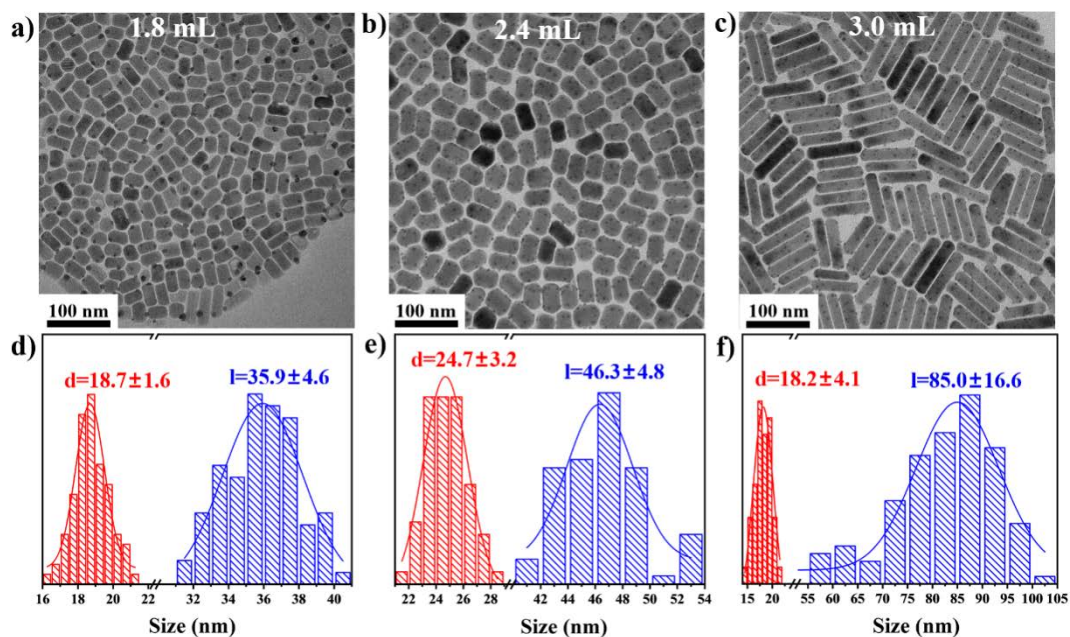

**Figure S6.** (a-c) TEM image and (d-f) its particle size distribution of the product obtained by changing the amount of iodine precursor injection.

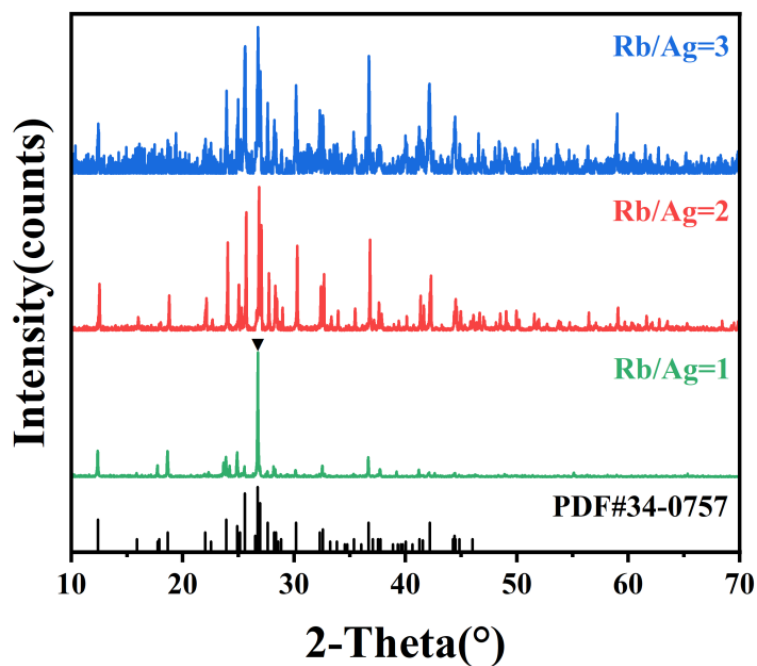

**Figure S7.** XRD pattern of the product obtained by changing the feeding ratio of rubidium salt and silver salt in the initial solution.

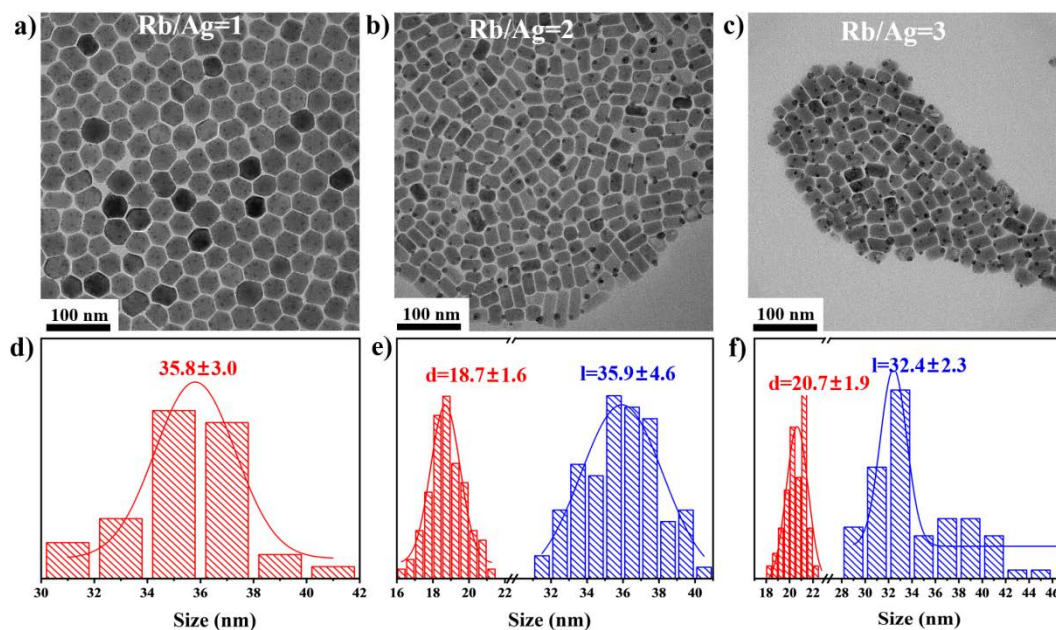

**Figure S8.** (a-c) TEM images and (d-f) its particle size distribution of the product obtained by changing the feeding ratio of rubidium salt and silver salt in the initial solution.

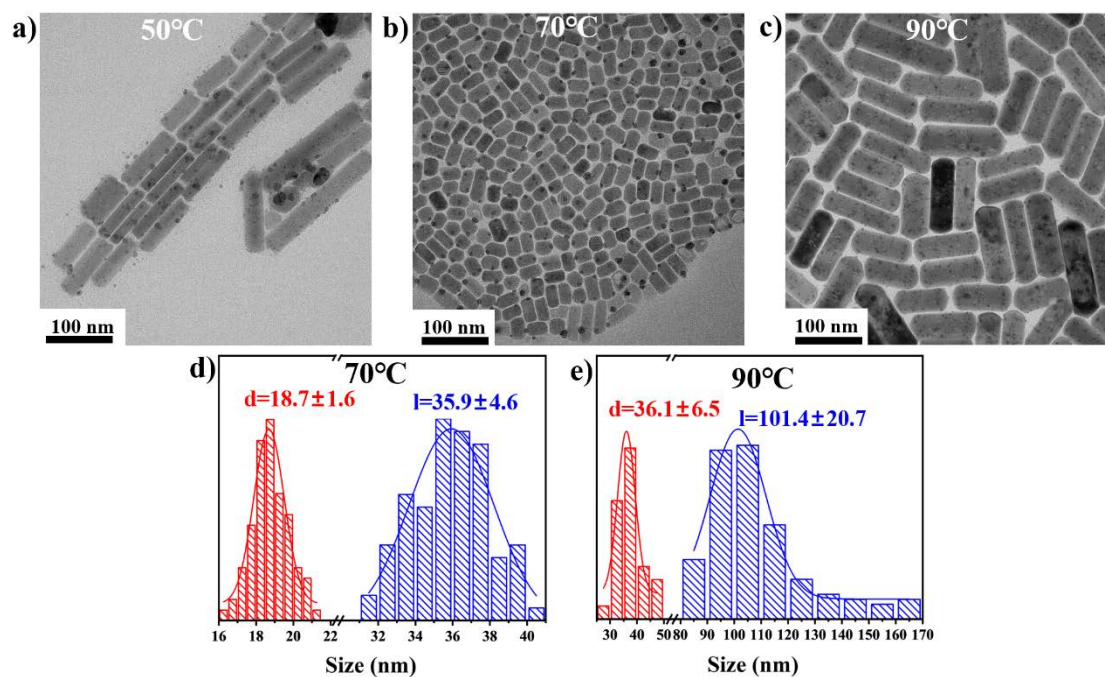

**Figure S9.** (a-c) TEM images and (d-e) its particle size distribution of the product obtained by changing the reaction temperature (50 °C, 70 °C, 90 °C).

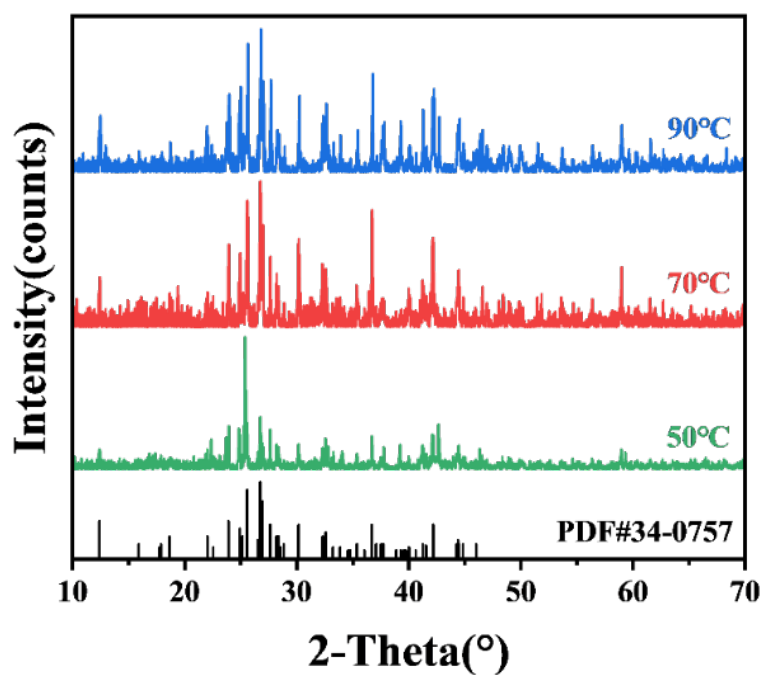

**Figure S10.** XRD pattern of the product obtained by changing the reaction temperature (50 °C, 70 °C, 90 °C).

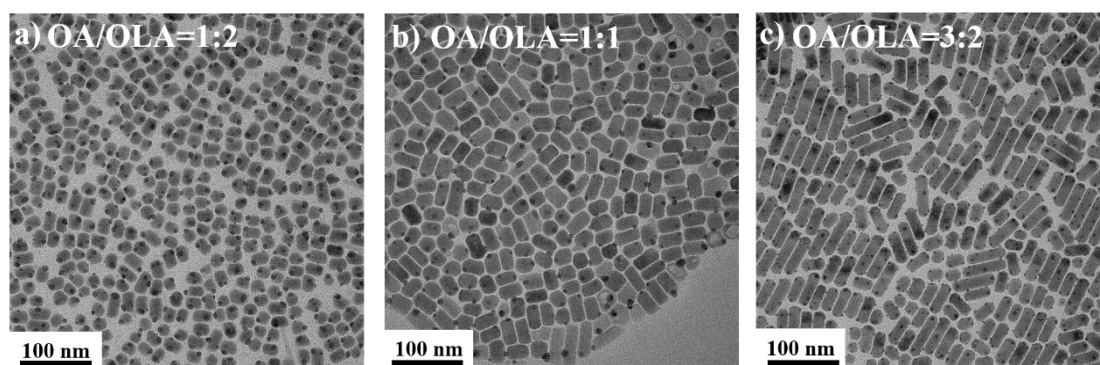

**Figure S11.** TEM image of the Rb<sub>2</sub>AgI<sub>3</sub> NCs obtained by changing the OA/OLA ratio.

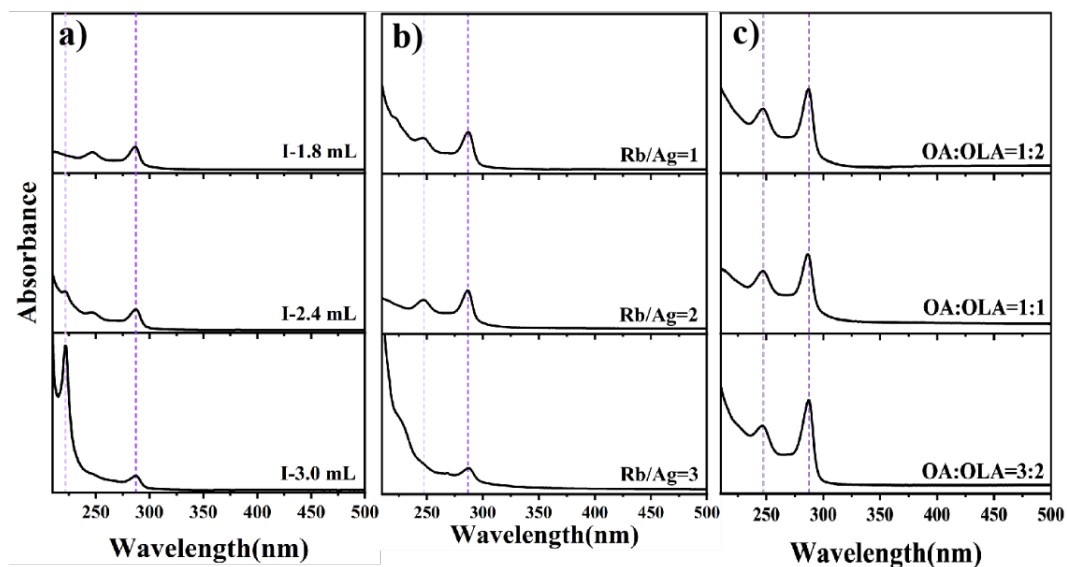

**Figure S12.** UV-Vis spectra of  $\text{Rb}_2\text{AgI}_3$  NCs obtained under different reaction conditions.

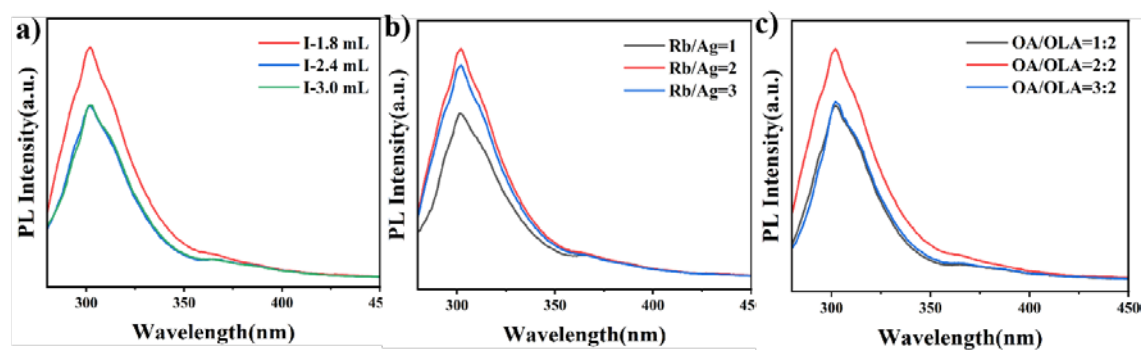

**Figure S13.** PL spectra of  $\text{Rb}_2\text{AgI}_3$  NCs obtained under different reaction conditions.
